# Supplementary material for: Hybrid structure of MWCNT/ferrite and GO incorporated composites for microwave shielding properties and their practical applications
Source: Royal Society of Chemistry journal article supplement (doi:10.1039/d1ra01129d), 2021-01-01

## Morphological Analysis of MWCNT, GO and Ferrite nanoparticles

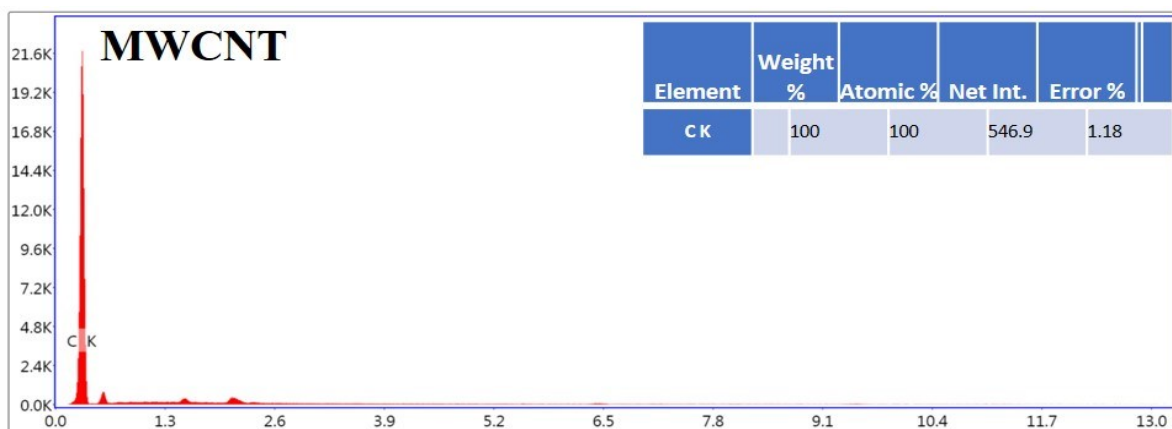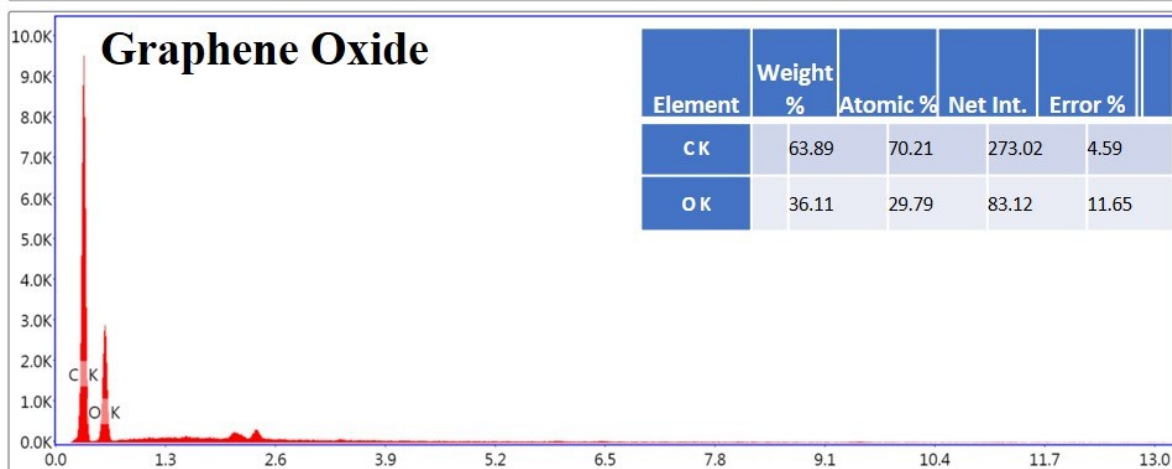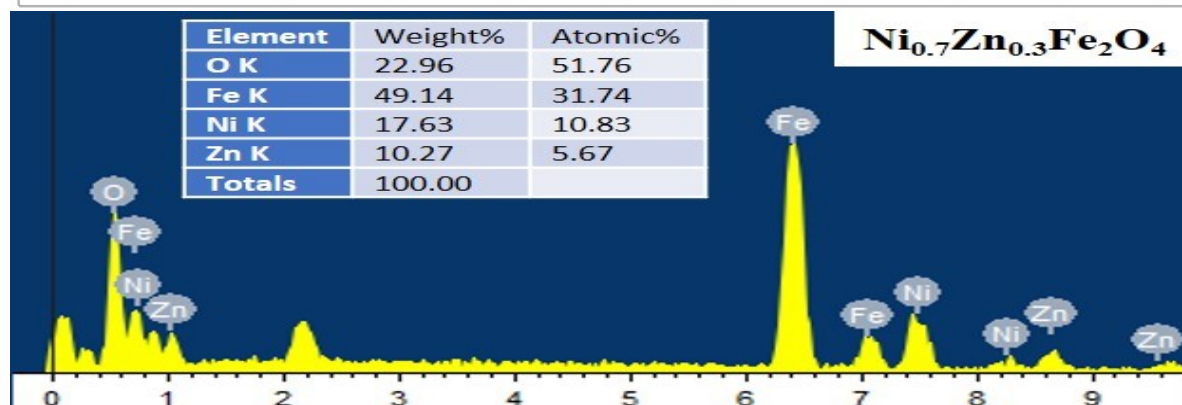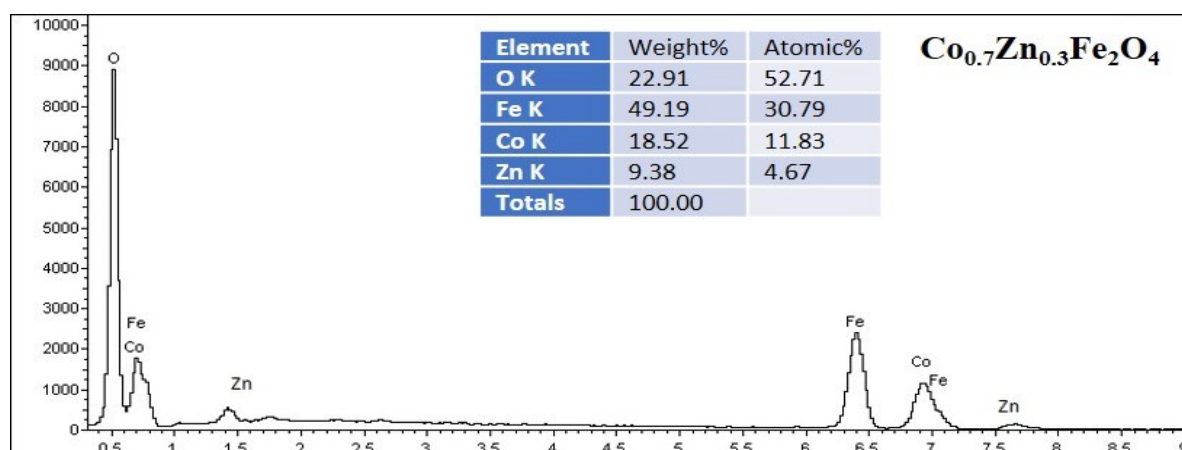

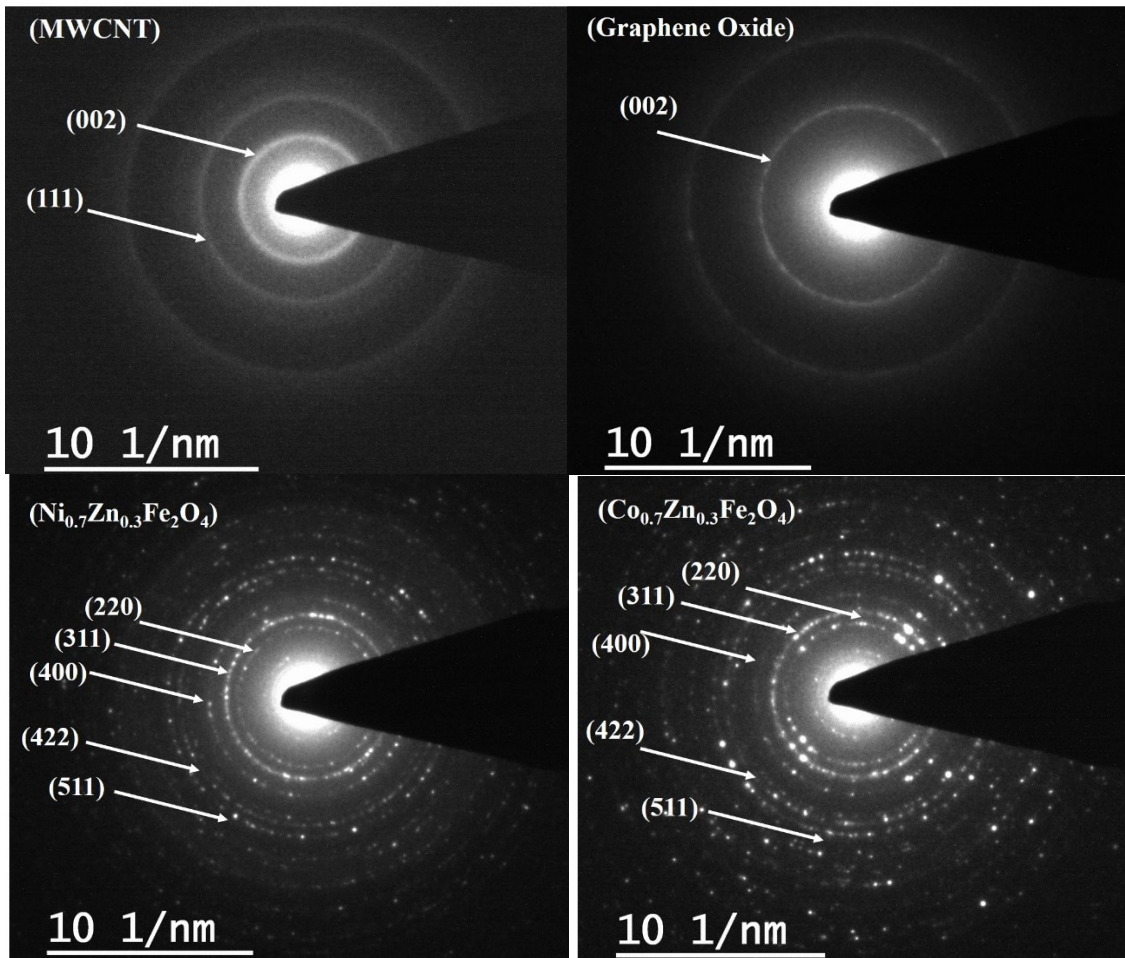

### Reflection, Absorption and Transmission Coefficients for Shielding Measurements

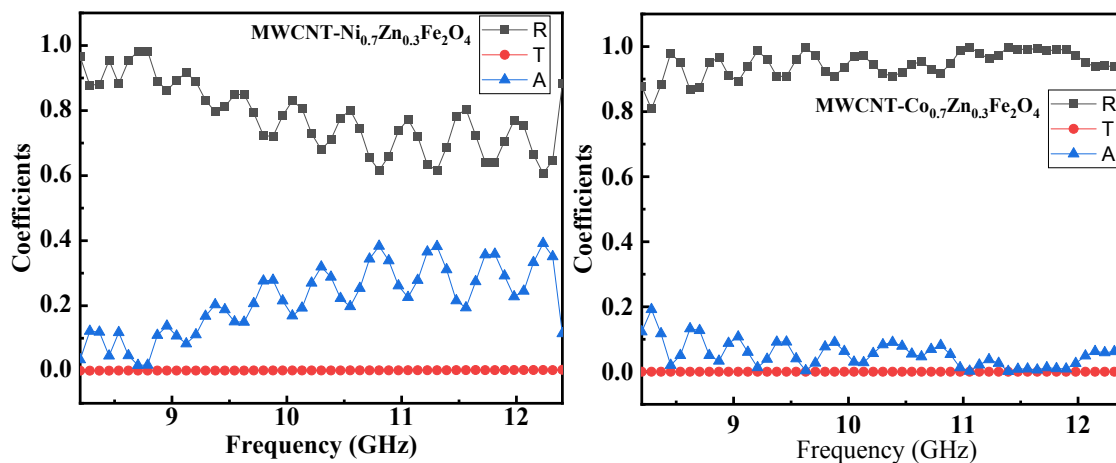

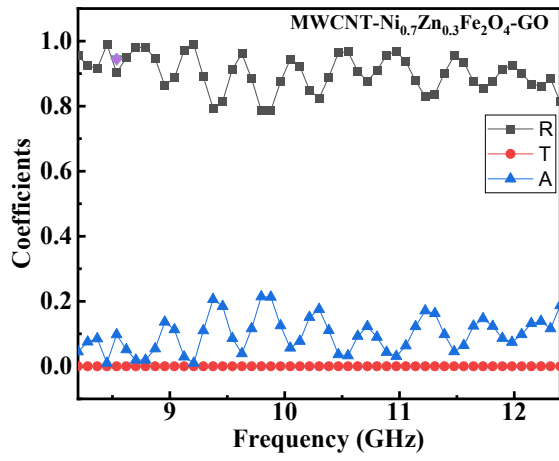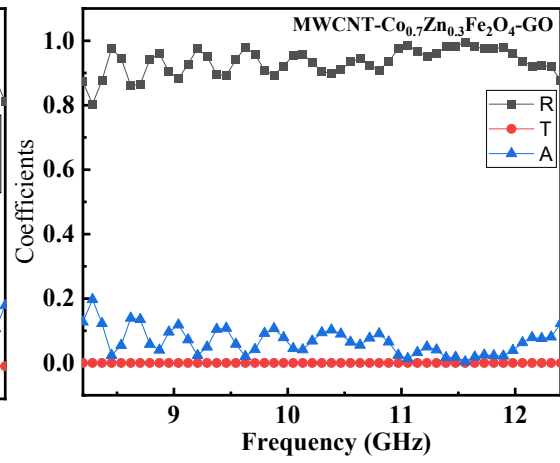

Supplement: d1ra01129d1.pdf [file d1ra01129d1.pdf]
